# Supplementary material
Source: PubMed Central journal article supplement (PMC6377260)
Supplement: NIHMS1512616-supplement-Supplemental_Material.pdf [file NIHMS1512616-supplement-Supplemental_Material.pdf]

## **Supplement Material**

For

### **Gene-based elevated triglycerides and T2D risk in the Women's Genome Health Study**

**Running title: Triglyceride, Genetics and Type 2 Diabetes**

Shafqat Ahmad<sup>1,2,3</sup>, Samia Mora<sup>2,4,5</sup>, Paul M Ridker<sup>4,5</sup>, Frank B Hu<sup>1,6</sup>, Daniel I Chasman<sup>2</sup>

<sup>1</sup>Department of Nutrition, Harvard T.H. Chan School of Public Health, Boston, MA, USA;

<sup>2</sup>Preventive Medicine Division, Brigham and Women's Hospital, Harvard Medical School, Boston, MA;

<sup>3</sup>Department of Medical Sciences, Molecular Epidemiology, Uppsala University, Sweden.

<sup>4</sup>Cardiovascular Division, Brigham and Women's Hospital, Harvard Medical School, Boston, MA;

<sup>5</sup>Center for Lipid Metabolomics, Brigham and Women's Hospital, Harvard Medical School, Boston;

<sup>6</sup>Channing Division of Network Medicine, Department of Medicine, Brigham and Women's Hospital and Harvard Medical School, Boston, MA, USA

Correspondence to: Dr. Daniel I Chasman, Preventive Medicine Division, Brigham and Women's Hospital, Harvard Medical School, Boston, MA

E-mail: [DCHASMAN@research.bwh.harvard.edu](mailto:DCHASMAN@research.bwh.harvard.edu)

**Supplemental Table I** Updated 127 TG-associated SNPs quality control information in the WGHS

| <b>SNP</b> | <b>POSITION</b> | <b>Nearest Gene</b>       | <b>Effect Allele</b> | <b>Other Allele</b> | <b>EAFF_WGHS</b> | <b>Published effect estimate</b> |
|------------|-----------------|---------------------------|----------------------|---------------------|------------------|----------------------------------|
| rs1077514  | 1:23766233      | <i>ASAP3:Intron</i>       | T                    | C                   | 0.85965          | 0.019                            |
| rs12748152 | 1:27138393      | <i>PIGV:Intergenic</i>    | T                    | C                   | 0.07840          | 0.031                            |
| rs16826069 | 1:39797055      | <i>MACF1:Ile39Val</i>     | G                    | A                   | 0.21588          | 0.025                            |
| rs4660293  | 1:40028180      | <i>PABPC4:Intron</i>      | G                    | A                   | 0.23605          | 0.024                            |
| rs10889353 | 1:63118196      | <i>DOCK7:Intron</i>       | A                    | C                   | 0.66714          | 0.077                            |
| rs1011731  | 1:172346548     | <i>DNM3:Intron</i>        | G                    | A                   | 0.42462          | 0.015                            |
| rs2785990  | 1:219687432     | <i>LYPLAL1:Intergenic</i> | T                    | C                   | 0.67293          | 0.016                            |
| rs2785980  | 1:219700519     | <i>LYPLAL1:Intergenic</i> | T                    | C                   | 0.67646          | 0.016                            |
| rs10489615 | 1:230304988     | <i>GALNT2:Intron</i>      | A                    | G                   | 0.38141          | 0.039                            |
| rs6749689  | 2:20396122      | <i>EPHA2:Intergenic</i>   | T                    | C                   | 0.44297          | 0.016                            |
| rs1367117  | 2:21263900      | <i>APOB:Thr98Ile</i>      | A                    | G                   | 0.31864          | 0.023                            |
| rs1049817  | 2:27550967      | <i>GTF3C2:Pro783Pro</i>   | A                    | G                   | 0.61854          | 0.056                            |
| rs1260333  | 2:27748624      | <i>PTPN14:Intergenic</i>  | A                    | G                   | 0.45328          | 0.095                            |
| rs7607980  | 2:165551201     | <i>COBLL1:Asn939Asp</i>   | T                    | C                   | 0.87549          | 0.045                            |
| rs3769823  | 2:202122995     | <i>CASP8:Lys14Arg</i>     | G                    | A                   | 0.71022          | 0.017                            |
| rs1344642  | 2:219555262     | <i>STK36:Arg583Gln</i>    | G                    | A                   | 0.55902          | 0.015                            |
| rs1801282  | 3:12393125      | <i>PPARG:Pro12Ala</i>     | C                    | G                   | 0.87383          | 0.023                            |
| rs13326165 | 3:52532118      | <i>STAB1:Intron</i>       | G                    | A                   | 0.79654          | 0.02                             |
| rs9311651  | 3:57528503      | <i>DNAH12:Val32Ala</i>    | A                    | G                   | 0.83795          | 0.021                            |
| rs645040   | 3:135926622     | <i>RFX5:Intergenic</i>    | T                    | G                   | 0.77924          | 0.023                            |
| rs6818397  | 4:3434885       | <i>RGS12:Intron</i>       | T                    | G                   | 0.40778          | 0.021                            |
| rs3748034  | 4:3446091       | <i>HGFAC:Ala218Ser</i>    | T                    | G                   | 0.14640          | 0.035                            |
| rs16844401 | 4:3449652       | <i>HGFAC:Arg509His</i>    | A                    | G                   | 0.07423          | 0.03                             |
| rs6831256  | 4:3473139       | <i>DOK7:Intron</i>        | G                    | A                   | 0.42323          | 0.021                            |
| rs442177   | 4:88030261      | <i>AFF1:Intron</i>        | T                    | G                   | 0.58753          | 0.031                            |
| rs13133548 | 4:89740128      | <i>FAM13A:Intron</i>      | A                    | G                   | 0.46191          | 0.014                            |
| rs1126673  | 4:100045616     | <i>ADH4:Val374Ile</i>     | T                    | C                   | 0.69046          | 0.017                            |

|            |             |                           |   |   |         |       |
|------------|-------------|---------------------------|---|---|---------|-------|
| rs13107325 | 4:103188709 | <i>SLC39A8:Ala391Thr</i>  | T | C | 0.06839 | 0.034 |
| rs4311394  | 5:53300662  | <i>ARL15:Intron</i>       | G | A | 0.25441 | 0.018 |
| rs459193   | 5:55806751  | <i>ASPM:Intergenic</i>    | G | A | 0.75341 | 0.023 |
| rs9686661  | 5:55861786  | <i>ASPM:Intergenic</i>    | T | C | 0.19671 | 0.042 |
| rs4976033  | 5:67714246  | <i>IGFN1:Intergenic</i>   | G | A | 0.42309 | 0.018 |
| rs26008    | 5:131008194 | <i>FNIP1:Gln620Arg</i>    | T | C | 0.06400 | 0.028 |
| rs6882076  | 5:156390297 | <i>TIMD4:Upstream</i>     | C | T | 0.63332 | 0.038 |
| rs1501908  | 5:156398169 | <i>ATP1A2:Intergenic</i>  | C | G | 0.63443 | 0.038 |
| rs3130564  | 6:31101674  | <i>PSORS1C1:Intron</i>    | C | T | 0.78902 | 0.033 |
| rs2844480  | 6:31564821  | <i>F5:Intergenic</i>      | T | C | 0.19720 | 0.023 |
| rs1057373  | 6:32813279  | <i>TAP1:Utr3</i>          | A | C | 0.08756 | 0.03  |
| rs998584   | 6:43757896  | <i>SH2D5:Intergenic</i>   | A | C | 0.47433 | 0.034 |
| rs6905288  | 6:43758873  | <i>SH2D5:Intergenic</i>   | A | G | 0.56028 | 0.033 |
| rs9472138  | 6:43811762  | <i>SH2D5:Intergenic</i>   | C | T | 0.71293 | 0.02  |
| rs2745353  | 6:127452935 | <i>RSPO3:Intron</i>       | T | C | 0.52864 | 0.02  |
| rs643381   | 6:139839423 | <i>TXNIP:Intergenic</i>   | C | A | 0.48562 | 0.023 |
| rs12208357 | 6:160543148 | <i>SLC22A1:Arg61Cys</i>   | T | C | 0.07532 | 0.032 |
| rs1564348  | 6:160578860 | <i>SLC22A1:Intron</i>     | C | T | 0.16127 | 0.02  |
| rs7758229  | 6:160840252 | <i>SLC22A3:Intron</i>     | T | G | 0.32667 | 0.018 |
| rs4410790  | 7:17284577  | <i>NCSTN:Intergenic</i>   | C | T | 0.624   | 0.015 |
| rs4722551  | 7:25991826  | <i>HMCN1:Intergenic</i>   | T | C | 0.83825 | 0.026 |
| rs2240466  | 7:72856269  | <i>BAZ1B:Intron</i>       | G | A | 0.88122 | 0.12  |
| rs1178979  | 7:72856430  | <i>BAZ1B:Intron</i>       | T | C | 0.80273 | 0.096 |
| rs35332062 | 7:73012042  | <i>MLXIPL:Ala358Val</i>   | G | A | 0.87100 | 0.12  |
| rs38855    | 7:116358044 | <i>MET:Intron</i>         | A | G | 0.53139 | 0.014 |
| rs4731702  | 7:130433384 | <i>SNX27:Intergenic</i>   | C | T | 0.51161 | 0.027 |
| rs972283   | 7:130466854 | <i>SNX27:Intergenic</i>   | G | A | 0.52348 | 0.027 |
| rs4841132  | 8:9183596   | <i>NECAP2:Intergenic</i>  | A | G | 0.08719 | 0.035 |
| rs11776767 | 8:10683929  | <i>PINX1:Intron</i>       | C | G | 0.37553 | 0.022 |
| rs3947     | 8:11702375  | <i>CTSB:Utr3</i>          | A | G | 0.26004 | 0.024 |
| rs4921914  | 8:18272438  | <i>PGLYRP4:Intergenic</i> | C | T | 0.22212 | 0.035 |
| rs1495741  | 8:18272881  | <i>PGLYRP4:Intergenic</i> | G | A | 0.22269 | 0.035 |

|            |              |                            |   |   |         |       |
|------------|--------------|----------------------------|---|---|---------|-------|
| rs2081687  | 8:59388565   | <i>IGSF9:Intergenic</i>    | T | C | 0.34043 | 0.019 |
| rs2954029  | 8:126490972  | <i>AMPD1:Intergenic</i>    | A | T | 0.53641 | 0.08  |
| rs2954033  | 8:126493746  | <i>AMPD1:Intergenic</i>    | A | G | 0.30890 | 0.082 |
| rs2954038  | 8:126507389  | <i>AMPD1:Intergenic</i>    | C | A | 0.30582 | 0.087 |
| rs3927680  | 9:16887366   | <i>OR6P1:Intergenic</i>    | T | A | 0.39992 | 0.018 |
| rs1883025  | 9:107664301  | <i>ABCA1:Intron</i>        | C | T | 0.74439 | 0.022 |
| rs1935     | 10:64927823  | <i>JMJD1C:Glu2299Asp</i>   | C | G | 0.51238 | 0.029 |
| rs12355784 | 10:65121565  | <i>JMJD1C:Intron</i>       | C | A | 0.51154 | 0.03  |
| rs7901016  | 10:74637326  | <i>CCDC109A:Intron</i>     | C | T | 0.05031 | 0.042 |
| rs2068888  | 10:94839642  | <i>C1orf106:Intergenic</i> | G | A | 0.54792 | 0.032 |
| rs2255141  | 10:113933886 | <i>GPAM:Intron</i>         | G | A | 0.71153 | 0.019 |
| rs2792751  | 10:113940329 | <i>GPAM:Ile43Val</i>       | C | T | 0.71133 | 0.02  |
| rs7940646  | 10:113940329 | <i>GPAM:Ile43Val</i>       | C | T | 0.68239 | 0.016 |
| rs2167079  | 11:10669228  | <i>MRVI1:Intron</i>        | C | T | 0.70480 | 0.02  |
| rs174546   | 11:47270255  | <i>ACP2:Arg29Gln</i>       | T | C | 0.33592 | 0.052 |
| rs174547   | 11:61569830  | <i>FADS1:Utr3</i>          | C | T | 0.33587 | 0.052 |
| rs174550   | 11:61570783  | <i>FADS1:Intron</i>        | C | T | 0.33582 | 0.052 |
| rs11820589 | 11:61571478  | <i>FADS1:Intron</i>        | A | G | 0.06483 | 0.19  |
| rs10047462 | 11:116633862 | <i>BUD13:Pro148Leu</i>     | G | T | 0.10347 | 0.11  |
| rs10892063 | 11:116722041 | <i>SIK3:Intron</i>         | A | C | 0.36044 | 0.058 |
| rs4149056  | 11:116896155 | <i>SIK3:Intron</i>         | C | T | 0.15772 | 0.029 |
| rs1106766  | 12:21331549  | <i>SLCO1B1:Val174Ala</i>   | C | T | 0.77240 | 0.03  |
| rs10861661 | 12:57809456  | <i>CFH:Intergenic</i>      | C | A | 0.23852 | 0.019 |
| rs11057401 | 12:107174646 | <i>RIC8B:Intron</i>        | T | A | 0.68156 | 0.028 |
| rs7157785  | 12:124427306 | <i>CCDC92:Ser70Cys</i>     | T | G | 0.16251 | 0.023 |
| rs3803357  | 14:64235556  | <i>NPR1:Intergenic</i>     | C | A | 0.49745 | 0.017 |
| rs3742970  | 15:40751555  | <i>BAHD1:Gln298Lys</i>     | A | C | 0.08886 | 0.038 |
| rs10468017 | 15:43622265  | <i>LCMT2:Arg142Ser</i>     | T | C | 0.27708 | 0.034 |
| rs1532085  | 15:58678512  | <i>SNX27:Intergenic</i>    | A | G | 0.37324 | 0.031 |
| rs1800588  | 15:58683366  | <i>SNX27:Intergenic</i>    | T | C | 0.21611 | 0.047 |
| rs7200543  | 15:58723675  | <i>SNX27:Intergenic</i>    | G | A | 0.30366 | 0.024 |
| rs1135999  | 16:15129970  | <i>PDXDC1:Leu736Leu</i>    | G | A | 0.30336 | 0.024 |

|            |             |                           |   |   |         |       |
|------------|-------------|---------------------------|---|---|---------|-------|
| rs1421085  | 16:15131962 | <i>NTAN1:Ser287Pro</i>    | C | T | 0.40600 | 0.019 |
| rs9989419  | 16:53800954 | <i>FTO:Intron</i>         | A | G | 0.39543 | 0.019 |
| rs173539   | 16:56985139 | <i>OR10K2:Intergenic</i>  | C | T | 0.68007 | 0.034 |
| rs247616   | 16:56988044 | <i>OR10K2:Intergenic</i>  | C | T | 0.68535 | 0.036 |
| rs3764261  | 16:56989590 | <i>OR10K2:Intergenic</i>  | C | A | 0.68314 | 0.036 |
| rs9939224  | 16:56993324 | <i>OR10K2:Intergenic</i>  | T | G | 0.20006 | 0.034 |
| rs7499892  | 16:57002732 | <i>CETP:Intron</i>        | T | C | 0.17689 | 0.04  |
| rs5880     | 16:57006590 | <i>CETP:Intron</i>        | C | G | 0.05201 | 0.039 |
| rs2000999  | 16:57015091 | <i>CETP:Ala390Pro</i>     | A | G | 0.19786 | 0.021 |
| rs2925979  | 16:72108093 | <i>HPR:Intron</i>         | T | C | 0.29772 | 0.029 |
| rs7946     | 16:81534790 | <i>CMIP:Intron</i>        | C | T | 0.26372 | 0.016 |
| rs12453522 | 17:17409560 | <i>PEMT:Val12Met</i>      | G | A | 0.17257 | 0.021 |
| rs11871606 | 17:41931375 | <i>CD300LG:Thr194Ala</i>  | A | C | 0.49982 | 0.016 |
| rs2292642  | 17:45732774 | <i>KPNB1:Intron</i>       | C | T | 0.38870 | 0.02  |
| rs4129767  | 17:76395430 | <i>PGS1:Gly172Gly</i>     | G | A | 0.50195 | 0.015 |
| rs489693   | 18:57882787 | <i>DVL1:Intergenic</i>    | A | C | 0.32544 | 0.015 |
| rs12970134 | 18:57882787 | <i>DVL1:Intergenic</i>    | A | G | 0.26918 | 0.017 |
| rs891088   | 18:57884750 | <i>DVL1:Intergenic</i>    | A | G | 0.73804 | 0.017 |
| rs7248104  | 19:7184762  | <i>INSR:Intron</i>        | G | A | 0.59212 | 0.02  |
| rs7255436  | 19:7224431  | <i>INSR:Intron</i>        | C | A | 0.47088 | 0.019 |
| rs58542926 | 19:8433196  | <i>ANGPTL4:Intron</i>     | C | T | 0.92458 | 0.12  |
| rs731839   | 19:19379549 | <i>TM6SF2:Glu167Lys</i>   | G | A | 0.33978 | 0.015 |
| rs8182584  | 19:33899065 | <i>PEPD:Intron</i>        | T | G | 0.38135 | 0.016 |
| rs157580   | 19:33909710 | <i>PEPD:Intron</i>        | A | G | 0.61120 | 0.047 |
| rs769449   | 19:45395266 | <i>TOMM40:Intron</i>      | A | G | 0.11769 | 0.35  |
| rs7412     | 19:11350874 | <i>LOC55908:Gln121Stp</i> | T | C | 0.08537 | 0.12  |
| rs439401   | 19:45412079 | <i>APOE:Arg176Cys</i>     | C | T | 0.63052 | 0.075 |
| rs445925   | 19:45414451 | <i>ATP13A2:Intergenic</i> | A | G | 0.10465 | 0.12  |
| rs492602   | 19:45415640 | <i>ATP13A2:Intergenic</i> | G | A | 0.48041 | 0.018 |
| rs2287922  | 19:49206417 | <i>FUT2:Ala69Ala</i>      | A | G | 0.49222 | 0.019 |
| rs2280401  | 19:49232226 | <i>RASIP1:Arg601Cys</i>   | G | A | 0.83758 | 0.02  |
| rs7679     | 19:50000009 | <i>RPS11:Intron</i>       | C | T | 0.18876 | 0.053 |

|           |             |                        |   |   |         |       |
|-----------|-------------|------------------------|---|---|---------|-------|
| rs6062343 | 20:44576502 | <i>PCIF1:Utr3</i>      | G | A | 0.55395 | 0.018 |
| rs738322  | 22:38546033 | <i>TCEA2:Intron</i>    | A | G | 0.51948 | 0.02  |
| rs5757251 | 22:38569006 | <i>PLA2G6:Intron</i>   | A | G | 0.36881 | 0.016 |
| rs738409  | 22:39100128 | <i>NPR1:Intergenic</i> | C | G | 0.77495 | 0.018 |

---

EAF\_WGHS: effect allele frequency in the Women's Genome Health Study cohort. Published effect estimate:

**Supplemental Table II** Association of TG with the incidence of T2DM across tertiles of GRS in the WGHS (total sample)

|                          | Model     | 1st GRS tertile |              |      | 2nd GRS tertile |              |      | 3rd GRS tertile |              |      | <i>P</i> <sub>interaction</sub> |
|--------------------------|-----------|-----------------|--------------|------|-----------------|--------------|------|-----------------|--------------|------|---------------------------------|
|                          |           | HR              | HR (95% CIs) |      | HR              | HR (95% CIs) |      | HR              | HR (95% CIs) |      |                                 |
| Triglycerides (mmol/L)   | Basic     | 1.87            | 1.75         | 2.00 | 1.75            | 1.65         | 1.86 | 1.66            | 1.57         | 1.75 | 0.0012                          |
|                          | Full      | 1.45            | 1.34         | 1.57 | 1.38            | 1.28         | 1.49 | 1.37            | 1.29         | 1.46 | 0.1734                          |
| TRLP (nmol/l)            | Basic     | 1.01            | 1.01         | 1.01 | 1.01            | 1.00         | 1.01 | 1.01            | 1.01         | 1.01 | 0.2951                          |
|                          | Full      | 1.00            | 1.00         | 1.00 | 1.00            | 1.00         | 1.00 | 1.00            | 1.00         | 1.01 | 0.9597                          |
|                          | Full + TG | 1.00            | 1.00         | 1.00 | 1.00            | 1.00         | 1.00 | 1.00            | 1.00         | 1.00 | 0.4674                          |
| Very large TRLP (nmol/l) | Basic     | 1.66            | 1.54         | 1.78 | 1.49            | 1.39         | 1.59 | 1.50            | 1.42         | 1.58 | 0.0336                          |
|                          | Full      | 1.40            | 1.29         | 1.52 | 1.26            | 1.15         | 1.37 | 1.30            | 1.22         | 1.39 | 0.1595                          |
|                          | Full + TG | 1.14            | 1.02         | 1.28 | 1.00            | 0.89         | 1.12 | 1.09            | 0.99         | 1.20 | 0.2062                          |
| Large TRLP (nmol/l)      | Basic     | 1.19            | 1.17         | 1.22 | 1.15            | 1.13         | 1.18 | 1.14            | 1.13         | 1.16 | 0.0018                          |
|                          | Full      | 1.09            | 1.07         | 1.12 | 1.07            | 1.05         | 1.10 | 1.07            | 1.05         | 1.09 | 0.1106                          |
|                          | Full + TG | 1.01            | 0.98         | 1.05 | 0.99            | 0.96         | 1.03 | 0.97            | 0.93         | 1.00 | 0.0415                          |
| Medium TRLP (nmol/l)     | Basic     | 1.03            | 1.02         | 1.03 | 1.03            | 1.02         | 1.03 | 1.02            | 1.02         | 1.03 | 0.0526                          |
|                          | Full      | 1.01            | 1.00         | 1.01 | 1.01            | 1.00         | 1.01 | 1.01            | 1.00         | 1.01 | 0.3606                          |
|                          | Full + TG | 0.98            | 0.97         | 0.99 | 0.99            | 0.98         | 0.99 | 0.98            | 0.97         | 0.99 | 0.2207                          |
| Small TRLP (nmol/l)      | Basic     | 1.00            | 1.00         | 1.00 | 1.00            | 1.00         | 1.00 | 1.00            | 1.00         | 1.00 | 0.012                           |
|                          | Full      | 1.00            | 1.00         | 1.00 | 1.00            | 1.00         | 1.00 | 1.00            | 1.00         | 1.00 | 0.2549                          |
|                          | Full + TG | 1.00            | 1.00         | 1.00 | 1.00            | 1.00         | 1.00 | 1.00            | 1.00         | 1.00 | 0.5224                          |
| Very small TRLP (nmol/l) | Basic     | 1.01            | 1.01         | 1.01 | 1.01            | 1.01         | 1.01 | 1.01            | 1.01         | 1.01 | 0.2737                          |
|                          | Full      | 1.01            | 1.00         | 1.01 | 1.00            | 1.00         | 1.01 | 1.01            | 1.01         | 1.01 | 0.2099                          |
|                          | Full + TG | 1.00            | 1.00         | 1.00 | 1.00            | 1.00         | 1.00 | 1.00            | 1.00         | 1.01 | 0.7023                          |
| TRLZ (nm)                | Basic     | 1.07            | 1.06         | 1.08 | 1.06            | 1.05         | 1.07 | 1.07            | 1.06         | 1.07 | 0.5759                          |
|                          | Full      | 1.04            | 1.03         | 1.05 | 1.03            | 1.02         | 1.04 | 1.04            | 1.03         | 1.05 | 0.4683                          |
|                          | Full + TG | 1.03            | 1.01         | 1.04 | 1.01            | 1.00         | 1.02 | 1.02            | 1.00         | 1.03 | 0.1947                          |
| TRLTG (mmol/l)           | Basic     | 2.56            | 2.27         | 2.89 | 2.05            | 1.87         | 2.25 | 2.06            | 1.88         | 2.26 | 0.0027                          |
|                          | Full      | 1.59            | 1.38         | 1.83 | 1.43            | 1.27         | 1.62 | 1.46            | 1.30         | 1.64 | 0.1842                          |
|                          | Full + TG | 0.82            | 0.64         | 1.06 | 0.72            | 0.57         | 0.92 | 0.76            | 0.61         | 0.94 | 0.1214                          |

|                |           |      |      |      |      |      |      |      |      |      |        |
|----------------|-----------|------|------|------|------|------|------|------|------|------|--------|
| TRLTC (mmol/l) | Basic     | 4.65 | 3.54 | 6.11 | 3.55 | 2.80 | 4.50 | 3.82 | 3.03 | 4.82 | 0.131  |
|                | Full      | 1.88 | 1.38 | 2.55 | 1.68 | 1.27 | 2.23 | 1.91 | 1.46 | 2.50 | 0.6667 |
|                | Full + TG | 0.84 | 0.58 | 1.21 | 0.74 | 0.52 | 1.06 | 0.87 | 0.62 | 1.22 | 0.2438 |

Basic model was adjusted with age, PCs, VE and ASA; Fully adjusted model was adjusted with basic model + BMI, HDL; Full + TG: fully adjusted model + TG.



**Supplemental Table III** Association of TG-associated SNPs with T2DM incidence across two levels of TG ( $\leq 1.287$  vs  $\geq 1.287$ ) in fasting sample

| SNP        | Low TG Level |              |                |       | High TG Level |           |                |        |
|------------|--------------|--------------|----------------|-------|---------------|-----------|----------------|--------|
|            | HR           | Lower 95% CI | Higher 95 % CI | P     | HR            | Lower 95% | Higher 95 % CI | P      |
| rs12748152 | 1.13         | 0.87         | 1.48           | 0.360 | 1.11          | 0.95      | 1.29           | 0.188  |
| rs2131925  | 0.93         | 0.80         | 1.08           | 0.352 | 0.94          | 0.86      | 1.02           | 0.150  |
| rs4846914  | 1.03         | 0.88         | 1.19           | 0.743 | 0.93          | 0.85      | 1.01           | 0.101  |
| rs1260326  | 0.90         | 0.77         | 1.05           | 0.180 | 1.01          | 0.93      | 1.10           | 0.833  |
| rs2972146  | 0.99         | 0.85         | 1.16           | 0.916 | 1.00          | 0.92      | 1.10           | 0.944  |
| rs645040   | 1.05         | 0.88         | 1.26           | 0.590 | 1.03          | 0.93      | 1.14           | 0.570  |
| rs6831256  | 0.93         | 0.80         | 1.08           | 0.343 | 1.04          | 0.96      | 1.14           | 0.342  |
| rs442177   | 0.79         | 0.68         | 0.92           | 0.002 | 1.09          | 1.00      | 1.19           | 0.057  |
| rs9686661  | 0.86         | 0.70         | 1.05           | 0.142 | 0.97          | 0.87      | 1.08           | 0.591  |
| rs6882076  | 1.12         | 0.96         | 1.31           | 0.148 | 1.02          | 0.94      | 1.12           | 0.600  |
| rs998584   | 1.01         | 0.84         | 1.23           | 0.893 | 1.05          | 0.94      | 1.18           | 0.369  |
| rs719726   | 1.13         | 0.97         | 1.33           | 0.113 | 0.96          | 0.88      | 1.05           | 0.367  |
| rs4719841  | 1.02         | 0.88         | 1.19           | 0.772 | 0.98          | 0.90      | 1.07           | 0.647  |
| rs13238203 | 0.00         | 0.00         | 0.53           | 0.032 | 0.26          | 0.00      | 16.02          | 0.523  |
| rs17145738 | 0.92         | 0.74         | 1.15           | 0.455 | 0.95          | 0.83      | 1.09           | 0.443  |
| rs38855    | 1.03         | 0.89         | 1.20           | 0.665 | 0.96          | 0.88      | 1.04           | 0.311  |
| rs11776767 | 1.07         | 0.91         | 1.25           | 0.413 | 0.91          | 0.83      | 0.99           | 0.036  |
| rs1495741  | 1.08         | 0.90         | 1.29           | 0.395 | 1.03          | 0.93      | 1.14           | 0.576  |
| rs12678919 | 1.07         | 0.84         | 1.36           | 0.605 | 0.90          | 0.78      | 1.03           | 0.132  |
| rs2954029  | 1.09         | 0.94         | 1.26           | 0.264 | 0.98          | 0.90      | 1.07           | 0.721  |
| rs1832007  | 1.08         | 0.88         | 1.33           | 0.466 | 1.06          | 0.94      | 1.19           | 0.353  |
| rs10761731 | 0.94         | 0.81         | 1.10           | 0.441 | 0.95          | 0.87      | 1.04           | 0.244  |
| rs2068888  | 0.99         | 0.85         | 1.14           | 0.836 | 0.98          | 0.90      | 1.06           | 0.564  |
| rs174546   | 1.03         | 0.88         | 1.20           | 0.746 | 0.86          | 0.79      | 0.94           | 0.001  |
| rs964184   | 0.84         | 0.65         | 1.07           | 0.156 | 0.71          | 0.63      | 0.81           | <.0001 |
| rs11613352 | 0.93         | 0.78         | 1.10           | 0.374 | 0.97          | 0.87      | 1.07           | 0.483  |
| rs4765127  | 1.05         | 0.90         | 1.23           | 0.529 | 1.02          | 0.93      | 1.12           | 0.680  |
| rs2412710  | 0.83         | 0.44         | 1.58           | 0.569 | 1.30          | 0.99      | 1.71           | 0.064  |
| rs2929282  | 1.06         | 0.72         | 1.55           | 0.772 | 1.11          | 0.91      | 1.35           | 0.311  |
| rs1532085  | 1.09         | 0.94         | 1.27           | 0.275 | 0.96          | 0.88      | 1.04           | 0.320  |
| rs3198697  | 0.97         | 0.79         | 1.19           | 0.760 | 1.00          | 0.89      | 1.13           | 0.949  |
| rs11649653 | 0.99         | 0.84         | 1.18           | 0.932 | 1.03          | 0.93      | 1.14           | 0.524  |
| rs1121980  | 1.07         | 0.92         | 1.25           | 0.356 | 0.99          | 0.91      | 1.08           | 0.890  |
| rs3764261  | 0.92         | 0.77         | 1.09           | 0.322 | 0.92          | 0.83      | 1.02           | 0.126  |
| rs8077889  | 1.06         | 0.89         | 1.27           | 0.515 | 0.92          | 0.83      | 1.02           | 0.106  |
| rs7248104  | 1.01         | 0.87         | 1.17           | 0.934 | 1.02          | 0.94      | 1.11           | 0.611  |
| rs10401969 | 0.70         | 0.56         | 0.89           | 0.003 | 0.87          | 0.73      | 1.03           | 0.094  |
| rs731839   | 1.00         | 0.85         | 1.18           | 0.995 | 1.09          | 1.00      | 1.19           | 0.064  |
| rs6065906  | 0.87         | 0.71         | 1.06           | 0.166 | 0.99          | 0.89      | 1.10           | 0.820  |

|           |      |      |      |       |      |      |      |       |
|-----------|------|------|------|-------|------|------|------|-------|
| rs5756931 | 0.89 | 0.76 | 1.04 | 0.132 | 0.90 | 0.82 | 0.98 | 0.021 |
|-----------|------|------|------|-------|------|------|------|-------|

Models were adjusted for age, BMI, HDL and PCs.

**Supplemental Table IV** Association of TG with the incidence of T2DM across tertiles of GRS based upon 34 SNPs (T2DM associated SNPs excluded) in the WGHS

|                        | Model     | 1st GRS tertile |              |      | 2nd GRS tertile |              |      | 3rd GRS tertile |              |      | Pinteraction |
|------------------------|-----------|-----------------|--------------|------|-----------------|--------------|------|-----------------|--------------|------|--------------|
|                        |           | HR              | HR (95% CIs) |      | HR              | HR (95% CIs) |      | HR              | HR (95% CIs) |      |              |
| Triglycerides (mmol/L) | Basic     | 2.06            | 1.91         | 2.23 | 1.72            | 1.60         | 1.85 | 1.59            | 1.49         | 1.70 | <0.0001      |
|                        | Full      | 1.63            | 1.49         | 1.79 | 1.42            | 1.30         | 1.54 | 1.28            | 1.18         | 1.38 | 0.0001       |
| TRLP (nmol/l)          | Basic     | 1.01            | 1.01         | 1.01 | 1.01            | 1.00         | 1.01 | 1.01            | 1.00         | 1.01 | 0.0123       |
|                        | Full      | 1.00            | 1.00         | 1.01 | 1.00            | 1.00         | 1.00 | 1.00            | 1.00         | 1.00 | 0.1402       |
|                        | Full + TG | 1.00            | 1.00         | 1.00 | 1.00            | 1.00         | 1.00 | 1.00            | 1.00         | 1.00 | 0.0443       |
| VLTRLP (nmol/l)        | Basic     | 1.86            | 1.69         | 2.05 | 1.48            | 1.36         | 1.60 | 1.55            | 1.44         | 1.68 | 0.0484       |
|                        | Full      | 1.61            | 1.44         | 1.80 | 1.26            | 1.15         | 1.39 | 1.30            | 1.19         | 1.42 | 0.024        |
|                        | Full + TG | 1.18            | 1.02         | 1.38 | 1.00            | 0.88         | 1.14 | 1.14            | 1.01         | 1.29 | 0.0162       |
| LTRLP (nmol/l)         | Basic     | 1.21            | 1.18         | 1.24 | 1.16            | 1.13         | 1.18 | 1.13            | 1.11         | 1.15 | 0.0002       |
|                        | Full      | 1.11            | 1.08         | 1.14 | 1.08            | 1.06         | 1.11 | 1.05            | 1.02         | 1.07 | 0.0035       |
|                        | Full + TG | 0.99            | 0.95         | 1.04 | 1.00            | 0.95         | 1.04 | 0.97            | 0.93         | 1.01 | 0.001        |
| MTRLP (nmol/l)         | Basic     | 1.03            | 1.02         | 1.04 | 1.02            | 1.02         | 1.03 | 1.02            | 1.01         | 1.02 | 0.004        |
|                        | Full      | 1.01            | 1.00         | 1.02 | 1.01            | 1.00         | 1.02 | 1.00            | 0.99         | 1.01 | 0.0173       |
|                        | Full + TG | 0.98            | 0.97         | 0.99 | 0.98            | 0.97         | 0.99 | 0.98            | 0.97         | 0.98 | 0.0028       |
| STRLP (nmol/l)         | Basic     | 1.00            | 1.00         | 1.01 | 1.00            | 1.00         | 1.00 | 1.00            | 0.99         | 1.00 | 0.0008       |
|                        | Full      | 1.00            | 1.00         | 1.00 | 1.00            | 1.00         | 1.00 | 1.00            | 0.99         | 1.00 | 0.0507       |
|                        | Full + TG | 1.00            | 1.00         | 1.00 | 1.00            | 1.00         | 1.00 | 1.00            | 1.00         | 1.00 | 0.1667       |
| VSTRLP (nmol/l)        | Basic     | 1.01            | 1.01         | 1.01 | 1.01            | 1.01         | 1.01 | 1.01            | 1.01         | 1.01 | 0.6691       |
|                        | Full      | 1.01            | 1.00         | 1.01 | 1.00            | 1.00         | 1.01 | 1.01            | 1.00         | 1.01 | 0.4935       |
|                        | Full + TG | 1.00            | 1.00         | 1.00 | 1.00            | 1.00         | 1.00 | 1.00            | 1.00         | 1.01 | 0.9765       |
| TRLZ (nm)              | Basic     | 1.06            | 1.05         | 1.08 | 1.06            | 1.05         | 1.07 | 1.07            | 1.06         | 1.08 | 0.8731       |
|                        | Full      | 1.04            | 1.03         | 1.05 | 1.04            | 1.03         | 1.05 | 1.04            | 1.02         | 1.05 | 0.4952       |
|                        | Full + TG | 1.02            | 1.00         | 1.03 | 1.02            | 1.01         | 1.03 | 1.03            | 1.01         | 1.04 | 0.1788       |
| TRLTG (mmol/l)         | Basic     | 2.77            | 2.39         | 3.20 | 2.00            | 1.80         | 2.23 | 1.88            | 1.69         | 2.10 | 0.0002       |
|                        | Full      | 1.71            | 1.44         | 2.02 | 1.47            | 1.28         | 1.69 | 1.28            | 1.11         | 1.48 | 0.0105       |

|                |           |      |      |      |      |      |      |      |      |      |        |
|----------------|-----------|------|------|------|------|------|------|------|------|------|--------|
|                | Full + TG | 0.71 | 0.56 | 0.92 | 0.71 | 0.53 | 0.94 | 0.71 | 0.54 | 0.92 | 0.0016 |
| TRLTC (mmol/l) | Basic     | 5.17 | 3.81 | 7.03 | 3.14 | 2.38 | 4.14 | 2.83 | 2.16 | 3.69 | 0.0043 |
|                | Full      | 2.07 | 1.47 | 2.91 | 1.49 | 1.08 | 2.06 | 1.33 | 0.97 | 1.83 | 0.0617 |
|                | Full + TG | 0.64 | 0.42 | 0.97 | 0.53 | 0.35 | 0.82 | 0.66 | 0.44 | 0.98 | 0.0091 |

Basic model was adjusted with age and PCs

Fully adjusted model was adjusted with basic model + BMI, HDL; Full + TG: Fully adjusted model + TG

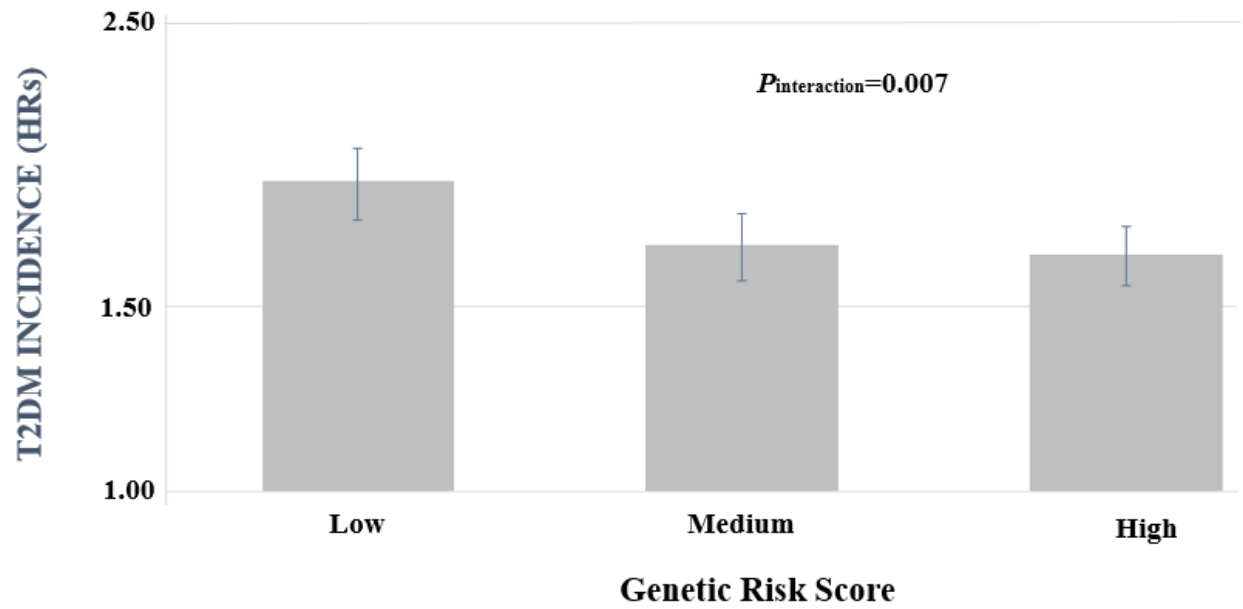

**Supplementary Figure I** Association of TG with T2DM incidence across TG-wGRS tertiles in the WGHS fasting sample (N= 15,813).

## WGHS T2DM beta coefficients in high v. low TG strata

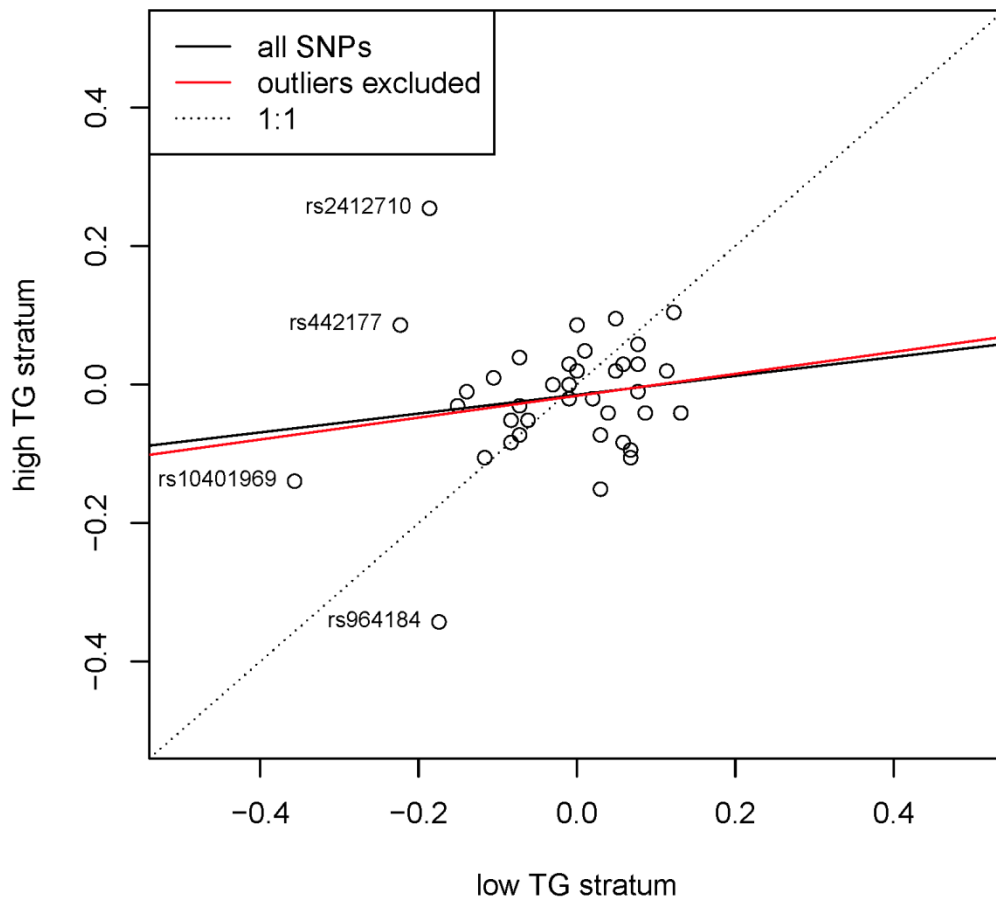

**Supplementary Figure II** Association of TG-associated SNPs with T2DM incidence across two levels of TG (low TG stratum  $\leq 1.287$  vs high TG stratum  $\geq 1.287$ ) in the fasting sample of the WGHS cohort. “Outliers” refers to SNPs judged to have disproportionate influence on the regression fit by virtue of at least one of several diagnostic measures (Methods)
